# Supplementary material for: Megakaryocytes assemble a three-dimensional cage of extracellular matrix that controls their maturation and anchoring to the vascular niche
Source: eLife. 2025 Oct 8;14:RP104963. doi: 10.7554/eLife.104963 (PMC12507435; doi:10.7554/eLife.104963)
Supplement: Figure 1—figure supplement 1—source data 1. [file elife-104963-fig1-figsupp1-data1.xlsx]

## Sheet: Suppl Figure 1
DATA SUPPL. FIGURE 1									STATISTICS
Suppl. Figure 1G - density of sMK and pMK with an ECM cage (%)									Mann-Whitney (Suppl. Figure 1G - density of sMK and pMK with an ECM cage (%))
Assay ≠		Sinusoid-associated MKs		MKs away from sinusoids		Total MK counted			w cage		pMK vs sMK
		w cage	w/o cage	w cage	w/o cage						**		0.005
1	Number MK	64	0	2	12	78
	MK %	100	0	14.28	85.72				Unpaired t test (Suppl. Figure 1H - pMK and sMK density (%))
2	Number MK	12	2	0	2	16			sMK vs. pMK
	MK %	85, 72	14.28	0	100				< 0,0001		****
3	Number MK	25	2	1	4	32
	MK %	92.6	7.4	20	80				Mann-Whitney (Suppl. Figure 1J - surface coverage (%))
Stats	Total MK	101	4	3	18	126			Stage I vs stage II		stage I vs stage III		stage II vs Stage III
	Mean %	92.77	7.23	11.43	88.57				ns 0,3308		* 0,0261		ns 0,1393
	sem	3.35	3.35	4.85	4.85
Suppl. Figure 1H - pMK and sMK density (%)
Lama4-/-
Assay	sMK	pMK
1	79.0123	20.9877
2	82.3529	17.6471
3	84.375	15.625
Mean	81.9134	18.0866
sem	1.56358	1.56358
sd	2.70821	2.70821
total MK	3	3
Suppl. Figure 1J - ECM cage coverage at all stages of MK maturation (%)
	Stage 1			Stage 2		Stage 3
Assay ≠	Number MK	coverage %	Assay ≠	Number MK	coverage %	Assay ≠	Number MK	coverage %
1	6	17.36	1	3	24.76	1	5	12.18
		19.57			22.76			16.44
		33.9			17.86			16.32
		39.8	2	11	17.38			16.29
		30.09			7.89			20.37
		38.34			14.79	2	6	5.05
2	11	14.8			15.8			17
		11.32			17.7			19.26
		15.55			19.55			13.6
		20.6			21.51			11.39
		17.99			14.85			17
		21.36			20.18	3	11	12.18
		18.73			12.449			16.44
		10.27			14.512			16.32
		16.06	Stats	Mean	17.2851			16.29
		16.5		sem	1.12			20.37
		18.9		Total MK	14			5.05
3	1	15.68						17
Stats	Mean	20.9344						19.26
	sem	2.011						13.6
	Total MK	18						11.39
								17
						Stats	Mean	14.9909
							sem	1.21
							Total MK	22
