# Supplementary material for: Megakaryocytes assemble a three-dimensional cage of extracellular matrix that controls their maturation and anchoring to the vascular niche
Source: eLife. 2025 Oct 8;14:RP104963. doi: 10.7554/eLife.104963 (PMC12507435; doi:10.7554/eLife.104963)
Supplement: Figure 2—figure supplement 1—source data 1. [file elife-104963-fig2-figsupp1-data1.xlsx]

## Sheet: Suppl Figure 2
DATA SUPPL. FIGURE 2																	STATISTICS
Suppl. Figure 2C top - Quantification of the percentage of P-sel positive platelets (%)								Suppl. Figure 2G - Number of released MK (BM Explants)									Multiple unpaired t tests (Suppl. Figure 2C top - P-selectin positive platelets (%)
Assay	Lamα4+/+			Lamα4-/-				3h				6h					Lamα4+/+ vs Lamα4-/-
	Resting	CRP	CRP+PAR4	Resting	CRP	CRP+PAR4		Lamα4+/+		Lamα4-/-		Lamα4+/+		Lamα4-/-			Resting		ns p=0.749
1	1.07	85.3	96.3	0.64	85.5	96.1		Assay	Number MK	Assay	Number MK	Assay	Number MK	Assay	Number MK		CRP		ns p=0.438
2	0.51	79.9	94	0.74	87.4	96.5		1	26	1	20	1	22	1	20		CRP+PAR4		ns p=0.230
3	0.56	85.6	95.9	0.97	96.5	96.7		2	22	2	17	2	14	2	29
Mean	0.713333	83.6	95.4	0.78	85.467	96.433		3	19	3	10	3	10	3	11		Multiple unpaired t tests (Suppl. Figure 2C bottom - integrin αIIbβIII positive platelets (%)
SEM	0.178916	1.852	0.709	0.098	1.126	0.176		Mean	22.3333	mean	15.6667	Mean	15.3333	mean	20		Lamα4+/+ vs Lamα4-/-
n	3	3	3	3	3	3		sem	2.028	sem	2.963	sem	3.528	sem	2.848		Resting		ns p=0.637
								Total MK	67	total MK	47	Total MK	46	total MK	60		CRP		ns p=0.413
Suppl. Figure 2C bottom - Quantification of the percentage of integrin αIIbβIII positive platelets (%)																	CRP+PAR4		ns p=0.485
Assay	Lamα4+/+			Lamα4-/-
	Resting	CRP	CRP+PAR4	Resting	CRP	CRP+PAR4											Unpaired t test (Suppl. Figure 2D - MK density)
1	0.3	95.8	98.9	0.13	95.5	98.3											Lamα4+/+ vs Lamα4-/-
2	0.16	89.9	96	0.25	96.5	98.8											0.7177		ns
3	0.22	95	98.4	0.46	98.8	98.3
Mean	0.227	93.567	97.767	0.28	95.367	98.467											Unpaired t test (Suppl. Figure 2G - BM explants)
SEM	0.041	1.848	0.895	0.096	0.696	0.167											Lamα4+/+ vs Lamα4-/-
n	3	3	3	3	3	3											3h	0.1369		ns
																	6h	0.1524		ns
Suppl. Figure 2D - MK density
Lamα4+/+ MK		Lamα4-/- MK
Assay	Number MK	Assay	Number MK
	2		2
	1		2
	1		1
	0		2
	1		1
	1		1
	5		1
	2		0
	0		1
	1		1
	2		2
	1		2
	2		2
	1		3
	0		2
	1		3
	1		4
	1		3
	0		4
	0		2
	2		0
	2		1
	0		3
	3		1
	2		2
	0		2
	4		4
	2		2
	1		1
	0		3
	4		2
	0		4
	2		3
	1		0
	1		0
	2		1
	1		1
	1		3
	4		2
	3		2
	3		0
	0		3
	5		2
	3		1
	1		2
	1		2
	0		2
	1		2
	4		1
	0		0
	0		1
	1		2
	3		2
	3		0
	2		1
	3		1
	1		3
	2		0
	1		1
	3		2
	4		1
	3		1
	1		2
	3		0
	0		3
	4		1
	3		0
	0		1
	1		1
	4		4
	1		1
	1		1
	1		2
	2		2
	2		0
	3		0
	3		2
	2		3
	0		4
	0		0
	4		4
	1		5
	5		3
	2		2
	3		0
	1		1
	3		1
	3	Mean	1.713
	1	SEM	1.2
	2	total MK	149
	4
	2
Mean	1.783
SEM	0.1432
total MK	164
