# Supplementary material for: Megakaryocytes assemble a three-dimensional cage of extracellular matrix that controls their maturation and anchoring to the vascular niche
Source: eLife. 2025 Oct 8;14:RP104963. doi: 10.7554/eLife.104963 (PMC12507435; doi:10.7554/eLife.104963)
Supplement: Figure 2—source data 1. [file elife-104963-fig2-data1.xlsx]

## Sheet: Figure 2
DATA FIGURE 2																											STATISTICS
Figure 2B (top left) - Laminin density around MK (%)							Figure 2B (bottom left) - Collagen IV density around MK (%)							Figure 2D - MK density					Figure 2C right - Sinusoid associated-MK (%)								Unpaired t test (figure 2B top - surface coverage MK - laminin)
WT MK			Lama4-/- MK				WT MK			Lama4-/- MK				WT MK		Lama4-/- MK			WT			Lama4-/-					WT vs Lama4-/-
Assay	Number MK	Coverage %	Assay	Number MK	Coverage %		Assay	Number MK	Coverage %	Assay	Number MK	Coverage %		Assay	Number MK	Assay	Number MK		Assay	Sample	Coverage %	Assay	Sample	Coverage %			< 0,0001		****
1	1	24.899	1	1	14.49		1	1	22.3	1	1	28.1		1	2	1	2		1	1	0.888889	1	1	0.571429
	2	23.334		2	13.44			2	22.674		2	29.32			1		2			2	0.5		2	0.454545			Unpaired t test (figure 2B top - surface coverage bm - laminin)
	3	22.298		3	15.53			3	26.108		3	23.98			1		1			3	0.888889		3	0.666667			WT vs Lama4-/-
	4	25.56		4	9.5			4	31.392		4	27.09			0		2			4	0.888889		4	0.416667			< 0,0001		****
	5	29.763		5	13.68			5	24.361		5	27.55			1		1			5	0.888889		5	0.636364
	6	23.42		6	13.24			6	24.911	2	6	25.04			1		1			6	0.818182		6	0.727273			Unpaired t test (figure 2B bottom- surface coverage MK - collagen IV)
Stats	Mean	24.879		7	11.43		Stats	Mean	25.291		7	24.41			5		1			7	1		7	0.875			WT vs Lama4-/-
	SEM	1.08773	2	8	15.73			SEM	1.35023		8	27.83			2		0			8	0.875		8	0.428571			0.4317		ns
	sd	2.66439		9	13.69			sd	3.30738		9	21.5			0		1			9	1		9	0.636364
	Total MK	6		10	16.48			Total MK	6		10	34.32			1		1			10	1		10	0.444444			Unpaired t test (figure 2B bottom - surface coverage bm - collagen IV)
				11	11.37					3	11	30.127			2		2			11	0.833333		11	0.636364			WT vs Lama4-/-
				12	14.28						12	28.733			1		2			12	0.625	2	12	0.75			0.9192		***
			3	13	19.396						13	27.334			2	2	2			13	1		13	0.555556
				14	17.629						14	24.7			1		3		Stats	Mean	0.862082		14	0.4			Mann-Whitney (figure 2D middle - MK density)
				15	17.515						15	17.952			0		2			SEM	0.0415402		15	0.5			WT vs Lama4-/-
				16	20.669						16	29.228			1		3			sd	0.149775		16	0.375			0.9228		ns
				17	19.086					Stats	Mean	26.7009			1		4			Total MK	13		17	0.571429
			Stats	Mean	15.1268						SEM	0.945771			1		3						18	0.5			Unpaired t test (figure 2E - sinusoid associated-MK)
				SEM	0.742773						sd	3.78309			0		4						19	0.75			WT vs Lama4-/-
				sd	3.06253						Total MK	16			0		2						20	0.75			< 0.001		****
				Total MK	17										2		0						21	0.5
															2		1						22	0.285714
															0		3						23	0.833333
Figure 2B (top right) - Laminin density in basement membrane (%)							Figure 2B (bottom right) - Collagen IV density in basement membrane (%)								3		1					3	24	0.375
WT			Lama4-/-				WT			Lama4-/-					2		2						25	0.625
Assay	Sample	Coverage %	Assay	Sample	Coverage %		Assay	Sample	Coverage %	Assay	Sample	Coverage %			0		2						26	0.7
1	1	67.273	1	1	3.377		1	1	62.298	1	1	53.333			4		4						27	0.6
		49.18			14.078				56.888			65.495			2		2						28	0.857143
		42.652			30.883				54.237			57.528			1		1						29	0.454545
		49.688			33.791				43.684			55.085			0		3						30	0.333333
	2	72.429		2	51.836				58.246	2	1	56.032			4		2						31	0.571429
		48.894			55.302				52.891			56.839			0		4						32	0.75
		57.547			36.288			2	69.148			47.389			2		3						33	0.166667
		67.581			29.684				57.151			53.644			1		0					Stats	Mean	0.566601
		73.559	2	3	15.74				43.73		2	47.893			1		0						SEM	0.0299536
		54.619			15.753				45.239			54.876			2		1						sd	0.172071
	3	55.665			3.747				42.087			42.222			1		1						Total MK	33
		60.983			22.128		Stats	Mean	53.2363			63.379			1		3
		55.997		4	5.868			SEM	2.62861	3	1	59.281			4		2
		69.951			17.678			sd	8.71811			64.524			3		2
		44.879			16.595			Total MK	11			39.912			3		0
Stats	Mean	58.0598			11.799							48.577			0		3
	SEM	2.61712			11.902						2	67.702		2	5		2
	sd	10.1361	Stats	Mean	22.1441							69.408			3	3	1
	Total zone	15		SEM	3.74516							37.665			1		2
				sd	15.4417							36.839			1		2
				Total zone	17							32.312			0		2
										Stats	Mean	52.854			1		2
											SEM	2.32111			4		1
											sd	10.6367			0		0
											Total MK	21			0		1
															1		2
															3		2
															3		0
															2		1
															3		1
															1		3
															2		0
															1		1
															3		2
															4		1
															3		1
															1		2
															3		0
															0		3
															4		1
															3		0
															0		1
															1		1
														3	4		4
															1		1
															1		1
															1		2
															2		2
															2		0
															3		0
															3		2
															2		3
															0		4
															0		0
															4		4
															1		5
															5		3
															2		2
															3		0
															1		1
															3		1
															3	Mean	1.71264
															1	SEM	0.128641
															2	sd	1.19988
															4	number value	87
															2
														Mean	1.78261
														SEM	0.143189
														sd	1.37342
														number values	92
