# Supplementary material for: Megakaryocytes assemble a three-dimensional cage of extracellular matrix that controls their maturation and anchoring to the vascular niche
Source: eLife. 2025 Oct 8;14:RP104963. doi: 10.7554/eLife.104963 (PMC12507435; doi:10.7554/eLife.104963)
Supplement: Figure 3—figure supplement 1—source data 1. [file elife-104963-fig3-figsupp1-data1.xlsx]

## Sheet: Suppl Figure 3
DATA SUPPL. FIGURE 3												STATISTICS
Suppl. Figure 3D - Laminin + or fibrinogen + granules/MK (%)												Unpaired t Test (Suppl. Figure 3D - Laminin + or fibrinogen + granules/MK (%))
Laminin				Fibrinogen								Pf4Cre vs Itgb1-/-/Itgb3-/-
Pf4cre Stage 3		itgb1-/-/itgb3-/- Stage 3		Pf4cre Stage 3		itgb1-/-/itgb3-/- Stage 3						Laminin granules			Fibrinogen granules
Assay	Number granules+/MK	Assay	Number granules+/MK	Assay	Number granules+/MK	Assay	Number granules+/MK					0.3626		ns	< 0.0001		****
1	25	1	21	1	149	1	13
2	24	2	36	2	133	2	22					Unpaired t test (Suppl. Figure 3F - surface coverage bm - laminin)
3	21	3	19	3	222	3	8					Pf4Cre vs Itgb1-/-/Itgb3-/-
4	34	4	41	4	155	4	4					0.0207			*
5	21	5	29	5	257	5	9
6	25	Mean	29.2	6	201	6	10					One Way ANOVA (Suppl. Figure 3G - Expression of fibrillar fibronectin (%))
Mean	25	sem	4.224	Mean	186.167	Mean	11					Pf4Cre vs Itgb1-/-/Itgb3-/-
sem	1.949	Total values	5	sem	19.75	sem	2.5					< 0,0001			***
Total values	6			Total values	6	Total values	6
Suppl. Figure 3F - Surface coverage basement membrane (%)					Suppl. Figure 3G - Expression of fibrillar fibronectin (%)
Pf4cre		itgb1-/-/itgb3-/-			Pf4cre			itgb1-/-/itgb3-/-
Assay	Coverage %	Assay	Coverage %		Mean	SD	n	Mean	SD	n
1	54.233	1	38.654		86	1.63	4	29.6	3.66	5
	65.501		42.044
	72.881		50.255
	62.049		34.574
	37.642		37.178
	45.703		52.478
	58.83		60.833
	47.516		54.033
	50.823		47.289
	55.741	Mean	46.3709
	50.962	SEM	2.94164
	69.226	sd	8.82493
	53.6	Total zone	9
	32.145
	56.309
	65.123
	57.331
	59.619
	59.967
	47.994
	66.538
	54.203
Mean	0
SEM	0
sd	0
Total zone	22
