# Supplementary material for: Megakaryocytes assemble a three-dimensional cage of extracellular matrix that controls their maturation and anchoring to the vascular niche
Source: eLife. 2025 Oct 8;14:RP104963. doi: 10.7554/eLife.104963 (PMC12507435; doi:10.7554/eLife.104963)
Supplement: Figure 3—source data 1. [file elife-104963-fig3-data1.xlsx]

## Sheet: Figure 3
DATA FIGURE 3														STATISTICS
Figure 3D left - Laminin density around MK (%)							Figure 3D right - Pore size (µm)							Unpaired t test (figure 3D left - surface coverage)
Pf4cre Stage 3			itgb1-/-/itgb3-/- Stage 3				Pf4Cre			itgb1-/-/itgb3-/-				Pf4Cre vs itgb1-/-/itgb3-/-
Assay	Number MK	Coverage %	Assay	Number MK	Coverage %		Assay	MK	Openings	Assay	MK	Openings		< 0.0001		***
1	5	12.18	1	5	7.6		1	1	2.03	1	1	9.07
		16.44			2.64				3.25			8.66		Mann-Whitney (figure 3D right - Pore size)
		16.32			2.1				3.13			6.32		Pf4Cre vs itgb1-/-/itgb3-/-
		16.29			10.3				3.82			5.47		0.0028		**
		20.37			2.8				3.07		2	12.29
2	7	15.5	2	8	9			2	2.28			13.28
		17.3			5.5				5.12		3	4.23
		18.4			6.1				13			22
		17.23			13.6				2.62		4	21.65
		18.94			4.1				5.67			3.23
		16.8			7.5			3	6.48		5	5.81
		23.8			9.8				3.72			9.11
3	5	20.8			14.1				6.18		6	7.19
		19.8	3	6	6				4.69			9.57
		18.92			10.32				4.69		7	6.45
		21.3			4.3			4	7.43			6.67
		22.1			5.8				7.6			4.75
Stats	Mean	18.3818			8.4				3.97		8	11.05
	sem	0.664			5.9				3.86			11.03
	Total MK	17	Stats	Mean	7.15053			5	2.43		9	29.7
				sem	0.766				9.33			7.19
				Total MK	19				3.06		10	28.13
									4.95		11	5.61
								6	10.34			13.13
									5.47		12	18.31
									2.05			6.03
									3.22		13	21.19
									0.8			2.23
									1.71		14	2.12
								7	3.17			14.77
									3.28			2.79
									10.52	Stats	mean	10.6139
									4.24		sem	7.27508
									2.81		Number MK	14
							2	8	6.78
									10.38
									16.19
								9	9.13
									6.85
									2.87
									1.89
								10	8.81
									5.87
									6.52
								11	23.2
								12	14.21
									7.84
								13	3.85
									16.11
								14	5.16
									9.97
									2.76
									1.34
								15	16.85
								16	6.43
									13.16
							Stats	mean	6.36
								sem	4.56287
								Number MKs	16
