# Supplementary material for: Megakaryocytes assemble a three-dimensional cage of extracellular matrix that controls their maturation and anchoring to the vascular niche
Source: eLife. 2025 Oct 8;14:RP104963. doi: 10.7554/eLife.104963 (PMC12507435; doi:10.7554/eLife.104963)
Supplement: Figure 4—figure supplement 1—source data 1. [file elife-104963-fig4-figsupp1-data1.xlsx]

## Sheet: Suppl Figure 4
DATA SUPPL. FIGURE 5								STATISTICS
Suppl. Figure 4A left - Quantification of the percentage of P-sel positive platelets (%)								Multiple unpaired t tests (Suppl. Figure 4A left - P-selectin positive platelets (%)
Assay	Pf4cre			itgb1-/-/itgb3-/-				Pf4Cre vs itgb1-/-itgb3-/-
	Resting	CRP	CRP+PAR4	Resting	CRP	CRP+PAR4		Resting		ns p=0.518
1	0.2	61.1	80.7	0.2	2.7	53.4		CRP+PAR4		ns p=0.043
2	0.1	NA	86.3	0.2	NA	77.2
3	0.1	42.1	92	0.1	1.1	53.8		Multiple unpaired t tests (Suppl. Figure 4A right - integrin αIIbβIII positive platelets (%)
Mean	0.133	51.6	86.333	0.167	1.9	61.467		Pf4Cre vs itgb1-/-itgb3-/-
sd	0.058	13.435	5.65	0.058	1.131	13.627		Resting		ns p=0.288
n	3	2	3	3	2	3
								Multiple unpaired t test (Suppl. Figure 4B - MK number/area)
Suppl. Figure 4A right - Quantification of the percentage of integrin αIIbβIII positive platelets (%)								Pf4Cre vs itgb1-/-itgb3-/-
Assay	Pf4cre			itgb1-/-/itgb3-/-						ns p=0.288
	Resting	CRP	CRP+PAR4	Resting	CRP	CRP+PAR4
1	0.2	95.5	99.5	0	0	0		one-way ANOVA with Bonferroni's test (figure 4C - maturation stages)
2	0.4	94.9	99.5	0.4	NA	NA		Pf4Cre vs itgb1-/-/itgb3-/-	stage I	stage II	Stage III
3	0.6	90.4	99.3	0.2	0	0			ns	ns	ns
Mean	0.4	93.6	99.4	0.2	0	0
sd	0.2	2.787	0.115	0.2	0	0
n	3	3	3	3	2	2
Suppl. Figure 4B - MK number/area
Pf4cre			itgb1-/-/itgb3-/-
Mean	SD	n	Mean	SD	n
1.9083	0.1	120	2.16	0.06	280
Suppl. Figure 4D - Maturation stages
Maturation stages	Pf4cre			itgb1-/-/itgb3-/-
	Mean	SD	n	Mean	SD	n
Stage I	12.2842	6.54421	12	14.5	4.6	15
Stage II	24.4	8.20735	12	22.5	6.2	15
Stage III	60.6	7.0403	12	60.9	8.5	15
