# Supplementary material for: Megakaryocytes assemble a three-dimensional cage of extracellular matrix that controls their maturation and anchoring to the vascular niche
Source: eLife. 2025 Oct 8;14:RP104963. doi: 10.7554/eLife.104963 (PMC12507435; doi:10.7554/eLife.104963)
Supplement: Figure 4—source data 1. [file elife-104963-fig4-data1.xlsx]

## Sheet: Figure 4 
DATA FIGURE 4																						STATISTICS
Figure 4B left - MK intravasation (%)					Figure 4B right - circulating MK (%)								Figure 4E - Whole intrasinusoidal MK events (%)									Mann-Whitney (figure 4B left - MK intravasation)
Pf4cre		itgb1-/-/itgb3-/-			Pf4cre		itgb1-/-/itgb3-/-							Pf4cre			itgb1-/-/itgb3-/-					Pf4Cre vs Itgb1-/-/Itgb3-/-
Assay	Number MK	Assay	Number MK		Assay	Number MK	Assay	Number MK					Assay ≠	Whole MK intras	Total MK	% whole MK	Assay ≠	Whole MK intras	Total MK	% whole MK intras					**0,0061
1	0	1	21.9272		1	0	1	3.98629					1	1	45	2.22	1	5	49	10.2
2	2.22222	2	15.754		2	0	2	1.02041					2	0	41	0	2	2	39	5.13		Mann-Whitney (figure 4B right - circulating MK)
3	0	3	11.1054		3	0	3	8.46561					3	0	50	0	3	2	42	4.76		Pf4Cre vs Itgb1-/-/Itgb3-/-
4	3.88889	4	14.8148		4	0	Mean	4.49						Stats	Mean	0.74		Stats	Mean	6.7					**0,0083
5	10.7143	Mean	15.9		5	0	SEM	2.164							sem	0.74			sem	1.756
6	6.2	SEM	2.246		6	0	sd	3.748							Total MK counted	136			Total MK counted	130		ANOVA - Kruskall-Wallis (figure 4C left - ECM cage density around MK)
7	5.7	sd	4.491		7	0	number value	3														all vs. PF4Crre		ns
Mean	4.104	number value	4		Mean	0
SEM	1.447				SEM	0							Figure 4G - Density of MK nucleus in the lung tissue									ANOVA - Kruskal-Wallis (figure 4C right - MK intravasation)
sd	3.828				sd	0							Pf4cre				itgb1-/-/itgb3-/-					0.0692		ns
number value	7				number value	7							Assay	number nucleus	surface µm2	Nucleus/µm2	Assay	number nucleus	surface µm2	Nucleus/µm2
													1	4	15.5	0.258065	1	43	23	1.86957		Paired t test (figure 4E - Whole intrasinusoidal MK)
Figure 4C left - Laminin density around MK (%)													2	7	17.3	0.404624	2	18	10	1.8		Pf4Cre vs itgb1-/-/itgb3-/-
Pf4cre			itgb1-/-			itgb3-/-			GPVI-/-				3	4	9.3	0.430108	3	35	19	1.84211		0.0279		*
Assay		Coverage	Assay		Coverage	Assay		Coverage	Assay		Coverage		4	4	12.78	0.312989	4	23	13.3	1.72932
1		22.76	1		11.64	1		28.08	1		24.46		5	9	10.5	0.857143	5	30	33	0.909091		Mann-Whitney (figure 4G - Density of MK nucleus in the lung tissue)
		26.05			16.58			29.96			26.19			Stats	mean	0.452586		Stats	mean	1.63002		Pf4Cre vs itgb1-/-/itgb3-/-
		20.18			20.2			25.77			25.69				sem	0.058			sem	0.108		0.0079		**
		21.75			5.11			26.6			25.65				Total nucleus	28			Total nucleus	149
2		35.4			12.75			31.06			20.39
		25.25			12.28			28.3			22.18
		26.22			16.54			28.71	Stats	mean	24.0933
		26.17			18.62			28.77		sem	0.95
		29.06	2		29.88			27.82		Total values	6
		23.51			21.48			29.23
		29.71			18.49	2		22.04
		29.2			16.32			29.35
		27.01			27.85			25.35
		25.67	Stats	mean	17.5185			26.96
Stats	mean	26.2814		sem	1.837			29.79
	sem	1.024		Total values	13	Stats	mean	27.8527
	Total values	14					sem	0.5823
							Total values	15
Figure 4C right - MK intravasation (%)
Pf4cre			itgb1-/-			itgb3-/-			GPVI-/-
Assay	Field	Number MK	Assay	Field	Number MK	Assay	Field	Number MK	Assay	Field	Number MK
1	1	0	1	1	0.1	1	1	0.125	1	1	0.0909091
	2	0		2	0		2	0		2	0
	3	0		3	0.285714		3	0.111111		3	0
	4	0		4	0.125		4	0.1875		4	0
	5	0		5	0.133333		5	0.3		5	0.0769231
	6	0		6	0		6	0.0833333		6	0
	7	11.1111		7	0.153846		7	0.25		7	0.0714286
	8	0		8	0.222222		8	0.0555556		8	0.111111
	9	0		9	0.0714286		9	0.0769231		9	0
	10	0		10	0		10	0.0666667		10	0
	11	0	2	1	0.375	2	1	0	Stats	mean	3.5
	12	0		2	0		2	0		sem	1.465
	13	0		3	0.142857		3	0.153846		Total values	10
	14	0		4	0.125		4	0.125
	15	0		5	0.333333		5	0.231
	16	0		6	0		6	0
	17	10	3	1	0		7	0.1
	18	0		2	0		8	0.142857
	19	13.3333		3	0.0714286		9	0.1
	20	14.2857		4	0.181818		10	0.333
	21	14.2857		5	0	3	1	0
	22	14.2857		6	0		2	0
	23	0		7	0.25		3	0
	24	0		8	0.25		4	0
	25	0		9	0		5	33.3333
	26	0		10	0.2		6	0
2	1	10	4	1	0		7	0
	2	22.2		2	0		8	28.5714
	3	0		3	0		9	0
	4	8.3		4	0		10	0
	5	0		5	9.09091		11	0
	6	9		6	0		12	0
	7	12.5		7	0		13	0
	8	0		8	60	Stats	mean	9.279
	9	0		9	0		sem	1.919
	10	0		10	11.1111		Total values	33
3	1	0		11	12.5
	2	0		12	0
	3	5.6		13	0
	4	0	Stats	mean	10.12
	5	0		sem	2.159
	6	0		Total values	39
	7	7.1
	8	9.1
	9	33.3
Stats	mean	4.32
	sem	1.089
	Total values	45
