# Supplementary material for: Megakaryocytes assemble a three-dimensional cage of extracellular matrix that controls their maturation and anchoring to the vascular niche
Source: eLife. 2025 Oct 8;14:RP104963. doi: 10.7554/eLife.104963 (PMC12507435; doi:10.7554/eLife.104963)
Supplement: Figure 5—figure supplement 1—source data 1. [file elife-104963-fig5-figsupp1-data1.xlsx]

## Sheet: Suppl Figure 5
DATA SUPPL. FIGURE 5
	Suppl. Figure 5B - Determination of the seeding (% of adhesion)
	Laminin 511 50 µg/mL			Fibronectin 300 µg/mL			Fibrinogen 100 µg/mL
Time (min)	15	30	45	15	30	45	15	30	45
% adhesion	43	71	90	46	68	88	32	68	78
