# Supplementary material for: Megakaryocytes assemble a three-dimensional cage of extracellular matrix that controls their maturation and anchoring to the vascular niche
Source: eLife. 2025 Oct 8;14:RP104963. doi: 10.7554/eLife.104963 (PMC12507435; doi:10.7554/eLife.104963)
Supplement: Figure 5—source data 1. [file elife-104963-fig5-data1.xlsx]

## Sheet: Figure 5
	DATA FIGURE 5																		STATISTICS
		Figure 5B - Adhesive strength (%)																	Multiple unpaired t tests (figure 5B - adhesive strength)
	ECM	Laminin				Fibronectin				Fibrinogen									Pf4cre vs Itgb3-/-/Itgb3-/-	laminin	fibronectin	fibrinogen
	Shape	Round		Spread		Round		Spread		Round		Spread							round	3e-06	0.000178	<0,000001
		Pf4cre	Itgb3-/-/Itgb3-/-	Pf4cre	Itgb3-/-/Itgb3-/-	Pf4cre	Itgb3-/-/Itgb3-/-	Pf4cre	Itgb3-/-/Itgb3-/-	Pf4cre	Itgb3-/-/Itgb3-/-	Pf4cre	Itgb3-/-/Itgb3-/-						spread	2e-06	0.000105	<0,000001
	Mean	25.7	82.9	74.3	5.05	21.2	91.16	78.7	8.83	17.76	80.63	82.49	16.77
	sd	5.05	4.92	11.3	5.09	7.91	4.35	5.78	5.36	5.35	0.32	5.5	2.45						Mann-Whitney (figure 5B - MK detachment)
	n	4	4	4	4	3	3	3	3	4	4	4	4						Pf4cre vs Itgb3-/-/Itgb3-/-	laminin	fibronectin	fibrinogen
																				ns 0,0952	*** 0,0003	** 0,0025
	Figure 5D - MK adhesion (%) Microfluidic chambers									Figure 5F - Number of released MK (BM Explants)
	Assay ≠	Laminin		Fibronectin		Fibrinogen				3h				6h					unpaired test t (figure 5F - explants)
		Pf4cre	Itgb3-/-/Itgb3-/-	Pf4cre	Itgb3-/-/Itgb3-/-	Pf4cre	Itgb3-/-/Itgb3-/-			Pf4cre		Itgb1-/-/Itgb3-/-		Pf4cre		Itgb1-/-/Itgb3-/-			3h - Pf4Cre vs Itgb1-/-/Itgb3-/-
	1	79.52	28.95	88.23	42.1	87.5	50			Assay	Number MK	Assay	Number MK	Assay	Number MK	Assay	Number MK		0.0359		*
	2	78.125	51.72	85.71	47.06	77.27	55.55			1	29	1	72	1	94	1	101		6h - Pf4Cre vs Itgb1-/-/Itgb3-/-
	3	73.68	52.56	92.86	54.16	77.77	55.5			2	26	2	77	2	66.6383	2	79		0.9951		ns
	4	72.41	56.73	81.25	38.09	87.8	44.68			3	32	3	141	3	38	3	128
	5	49.18	51.06	80.77	37.93	73.08	41.03			4	62	4	58	4	118	4	113
	Mean	70.583	48.204	94.73	57.89		68.52			5	72	5	63	5	100	5	67
	sem	4.94	4.4	61.9	50		62.07			6	74	6	84	6	105	6	109
	Total MK	224	296		29.41	80.68	53.9071			7	55	7	48	7	84	7	127
				83.63	44.58	2.64	3.36			8	81	8	109	8	146	8	53
				3.84	3.13	123	236			9	87	9	104	9	151	9	101
				150	187					10	76	10	45	10	151	10	138
										Mean	59.4	11	89	Mean	105.364	11	142
										sem	7.27	12	122	sem	7.27	mean	105.273
										Total MK	594	13	83	Total MK	594	sem	7.5
												mean	84.2308			total MK	1095
												sem	7.5
												total MK	1095
