# Supplementary material for: Megakaryocytes assemble a three-dimensional cage of extracellular matrix that controls their maturation and anchoring to the vascular niche
Source: eLife. 2025 Oct 8;14:RP104963. doi: 10.7554/eLife.104963 (PMC12507435; doi:10.7554/eLife.104963)
Supplement: Figure 6—figure supplement 1—source data 1. [file elife-104963-fig6-figsupp1-data1.xlsx]

## Sheet: Suppl Figure 6
DATA SUPPL. FIGURE 6																						STATISTICS
Suppl. Figure 6B - Platelets count													Suppl. Figure 6D middle - diameter of MK									Multiple unpaired t tests (Suppl. Figure 6B - Platelets count)
Mice ≠	DMSO					B+I							Day 3				Day 4					DMSO vs. B+I
	Day 0	Day 2	Day 4	Day 6	Day 8	Day 0	Day 2	Day 4	Day 6	Day 8			Control	DMSO	20nM	100nM	Control	DMSO	20nM	100nM		Day 0	Day 2	Day 4	Day 6	Day 8
1	916	832	1126	1018	1388	854	902	1226	1042	1250		Mean	22.74	21.89	21.2	20.97	24.18	24.08	22.17	23.39		ns	ns	ns	ns	ns
2	1032	962	832	904	1180	840	834	776	860	1272		SEM	0.27	0.34	0.34	0.37	0.29	0.37	0.35	0.35
3	630	924	926		1340	984	818	1180	1518	1542		sd	3.84	4	3.88	4.07	4.87	4.88	4.35	4.59		Multiple unpaired t tests (Suppl. Figure 2C top - P-selectin positive platelets (%)
4	948	1004	876	1204	1392	938	1060	1058	934	1262			22.29	14.6	18.28	18.99	26.71	25.6	18.89	25.27		DMSO vs. B+I
Mean	881.5	930.5	940	1042	1325	904	903.5	1060	1088.5	1331.5			26.16	21.13	17.76	19.49	27.06	27.67	31.34	25.06		Resting		ns p=0.387
SEM	87.328	36.673	64.905	87.43	49.756	34.341	55.253	101.084	147.963	70.311			21.92	17.34	27.49	19.54	26.28	22.39	32.16	24.89
sd	174.657	73.3462	129.81	151.433	99.5121	68.6828	110.506	202.168	295.925	140.621			23.38	22.66	20.55	24.27	27.47	26.8	24.92	23.33		Multiple unpaired t tests (Suppl. Figure 2C bottom - integrin αIIbβIII positive platelets (%)
													24.69	20.65	23.65	16.91	25.35	24.43	27.89	21.05		DMSO vs. B+I
Suppl. Figure 6C left - Quantification of the percentage of P-sel positive platelets (%)													19.18	18.56	22.41	18.28	31.18	18.05	21.96	20.67		Resting		ns p=0.443
Assay	DMSO			B+I									19.7	19.72	16.6	20.55	26.72	23.33	24.51	18.41
	Resting	CRP	CRP+PAR4	Resting	CRP	CRP+PAR4							24.04	25.35	30.23	29.63	22.6	31.04	24.27	26.09		ANOVA with Dunn's multiple comparisons test
1	0.8	9.7	87.3	0.5	28.2	86.2							19.44	22.94	17.83	23.11	26.16	22.41	24	22.39		(Suppl. Figure 6C left - number of MK/area)
2	0.5	18.6	86.7	0.5	20.7	85.3							23.5	26.79	19.72	26.71	29.91	21.96	24.2	27.33		Day 3	control	20 nM	100 nM
3	0.4	28.5	89.5	0.3									23.11	21.46	20.67	24.92	29.23	23.91	18.45	21.05			ns	ns	ns
Mean	0.567	18.933	87.833	0.433	24.45	85.75							21.23	24.09	16.85	22.48	29.1	22.66	20.06	19.11		Day 4	control	20 nM	100 nM
sd	0.208	9.404	1.474	0.115	5.303	0.636							21.96	27.44	18.28	21.02	33.5	29.68	21.33	24			ns	ns	ns
n	3	3	3	3	2	2							20.26	22.39	23.87	27.49	27.06	31.45	29.39	29.49
													23.65	20.26	24.69	21.71	26.79	23.2	27.13	31.08		Kruskal-Wallis - ANOVA test (Suppl. Figure 6C middle -
Suppl. Figure 2C bottom - Quantification of the percentage of integrin αIIbβIII positive platelets (%)													22.43	20.67	22.94	18.77	21.05	21.54	20.95	24.21		MK diameter (µm))
Assay	DMSO			B+I									20.98	20.14	23.87	23.82	21.77	37.07	18.95	23.75		Day 3	control	20 nM	100 nM
	Resting	CRP	CRP+PAR4	Resting	CRP	CRP+PAR4							22.09	18.78	18.63	23.65	27.18	22.48	22.66	26.72			ns	ns	ns
1	4.4	52.6	99.5	1	83.3	99.5							19.18	19.37	13.89	19.44	35.86	26.25	19.82	21.23		Day 4	control	20 nM	100 nM
2	1.1	72.2	99.7	1.1	75.3	99.6							24	16.49	24.67	19.86	25.35	29.2	19.82	23.28			ns	****<0.0001	ns
3	0.5	83.3	99.5	0.8									36.85	23.11	21.66	20.67	26.75	25.92	24.43	25.27
Mean	2	69.367	99.567	0.967	79.3	99.55							26.8	26.71	33.24	25.52	34.95	28.15	23.11	19.42		ANOVA with Dunn's multiple comparisons test
sd	2.1	15.545	0.115	153	5.657	0.071							18.74	22.04	21.23	20.44	27.47	30.16	21.85	27.67		(Suppl. Figure 6C right - number of MK forming PPT)
n	3	3	3	3	2	2							21.13	26.8	21.77	19.49	36.48	28.56	24.93	20.94		Day 4 vs DMSO	control	20 nM	100 nM
													19.64	22.24	21.92	21.13	25.35	25.6	23.11	26.08			ns	ns	ns
Suppl. Figure 6D left - number of MK/area													16.6	27.49	17.86	20.84	21.92	26.28	18.77	22.41
Assay	Day 3				Day 4								23.28	22.66	19.61	25.18	26.54	30.33	23.07	22.94
	Control	DMSO	20nM	100nM	Control	DMSO	20nM	100nM					20.33	25.64	22.39	20.44	27.18	22.94	18.06	20.53
1	74	48	40	47	143	99	77	112					25.26	18.05	21.85	23.68	22.43	23.15	20.02	24.64
2	57	38	41	36	106	70	67	57					29.73	20.33	27.52	23.43	29.61	27.49	16.48	23.87
3	64	55	49	35	101	61	64	50					26.24	25.39	21.05	18.05	22.24	28.89	25.27	21.71
Mean	65	47	43.33	39.33	116.7	76.67	69.33	73					26.28	24.52	16.29	19.06	27.89	23.11	21.05	24.92
SEM	4.933	4.933	2.848	3.844	13.25	11.46	3.93	19.6					24.21	24.43	17.45	23.03	28.41	25.28	26.28	17.86
sd	8.544	8.544	4.933	6.658	22.94	19.86	6.807	33.96					28.24	19.97	19.72	20.84	25.8	30.4	20.98	25.03
													26.95	27.78	20.06	19.44	20.33	26.75	17.56	22.48
Suppl. Figure 6D right - number of MK forming PPT													18.77	22.94	20.94	22.04	34.3	29.32	18.83	26.15
Assay	Day 4												26.03	23.81	18.56	24.54	25.83	30.35	30.47	27.18
	Control	DMSO	20nM	100nM									18.5	26.97	22.24	16.62	24.67	26.16	22.1	33.44
1	23.78	21.21	24.68	22.32									26.08	23.07	22.56	26.72	26.03	21.46	18.09	25.85
2	22.64	32.86	22.39	24.56									19.44	25.8	17.7	23.1	30.09	21.67	23.33	27.87
3	25.74	24.59	25	26									26.03	20.23	15.9	19.07	29.63	29.61	28.99	17.34
Mean	24.0533	26.22	24.0233	24.2933									27.49	26.03	18.99	24	34.05	34.68	30.03	24.21
SEM	0.9053	3.46	0.8219	1.071									28.03	20.11	20.02	26.95	22.09	30.3	24.54	20.26
sd	1.568	5.994	1.424	1.854									28.56	27.14	16.14	21.46	25.77	23.83	23.5	24.54
													23.9	21.72	16.14	28.12	23.5	24.71	21.72	25.26
													26.09	18.89	16.74	16.85	21.23	22.41	18.11	21.54
													25.6	21.23	18.89	16.37	25.52	28.08	18.89	29.61
													24.54	24.81	19.06	27.18	37.77	30.16	30.87	28.41
													23.57	22.94	23.91	18.95	29.39	21.77	26.72	28.89
													22.39	21.02	23.43	15.55	35.73	16.46	32.52	27.63
													22.83	21.33	22	27.17	23.68	21.85	19.7	28.63
													23.28	22.6	19.44	17.46	25.85	29.02	21.96	34.55
													25.18	17.76	20.07	19.5	29.68	29.76	23.75	24.59
													27.57	23.81	24.2	14.6	27.87	23.1	15.35	25.31
													36.88	18.78	18.45	13.79	33.83	30.15	14.18	26.28
													27.44	16.67	17.7	25.43	26.62	23.25	21.72	24
													17.76	23.48	21.02	21.54	19.49	21.32	24.54	26.56
													21.96	24.03	18.28	17.76	23.92	26.48	22.94	29.49
													22.83	25.64	23.6	14.18	21.24	22.39	22.38	30.63
													19.86	19.72	24.81	17.76	27.58	29.82	19.61	30.33
													24.51	18.89	18.41	18.05	23.11	27.52	16.85	26
													29.14	20.11	25.43	18.56	26.95	20.33	32.61	26
													20.33	20.98	26.48	22.29	23.38	23.15	20.11	21.72
													18.74	20.02	25.43	15.98	21.67	29.76	24	23.11
													25.77	15.9	18.95	22.41	30.04	31.89	17.34	38.37
													22.83	14.22	21.66	20.53	31.08	19.44	19.61	27.47
													20.33	14.88	18.05	29.39	26.04	28.91	20.38	23.6
													26.75	17.83	28.44	24.64	25.88	33.96	25.22	23.25
													24.54	13.01	23.65	18.11	26.72	22.41	19.54	28.03
													23.65	19.64	24.04	20.02	27.77	25.88	20.95	21.82
													19.49	29.1	19.61	17.36	31.28	34.3	17.56	25.52
													21.72	19.72	16.9	18.5	25.88	20.82	22.56	15.9
													22.29	29.1	26.08	15.02	26.72	24.09	14.44	25.06
													25.39	16.67	28.75	15.07	21.72	21.92	20.98	23.2
													23.14	25.27	20.65	21.38	28.85	20.98	18.56	22.04
													22.62	21.33	18.5	22.14	22.79	25.51	26	26.25
													31.36	17.33	17.46	16.62	26.16	23.2	19.97	29.1
													21.18	19.86	23.6	15.23	26.03	25.6	22.83	30.36
													19.16	18.77	19.37	19.82	22.48	22.09	18.89	31.38
													17.33	24.71	18.89	13.94	27.06	19.97	24.89	29.82
													24.98	24.03	23.4	16.37	28.08	25.03	21.71	25.43
													22.78	20.67	25.58	32.69	25.27	17.22	36.21	26.03
													24.27	19.44	25.36	18.56	27.43	22.48	30.74	31.05
													22.36	20.98	26.75	21.72	31.76	24.04	20.95	24.92
													21.72	15.31	19.5	20.21	34.99	26.04	24.67	30.47
													19.49	23.33	10.85	21.23	23.92	24	20.23	28.88
													28.3	24.21	22.48	18.41	23.28	21.05	18.18	29.76
													19.37	21.24	18.41	20.21	26.8	18.89	27.52	29.1
													20.33	23.83	17.45	16.67	21.77	23.65	23.11	21.23
													18.41	19.86	23.15	23.83	23.87	20.42	26.8	21.02
													28.75	23.57	22.24	26.28	21.67	23.83	21.85	23.51
													23.03	20.65	18.05	26.03	34.66	17.16	19.18	21.66
													24.84	24.26	18.56	23.9	18.28	22.66	25.35	22.66
													25.14	18.09	18.99	20.67	29.14	21.05	16.85	23.5
													27.06	22.48	19.5	18.05	27.52	13.56	21.32	19.64
													23.15	16.03	19.72	18.05	28.74	18.45	24.43	13.49
													27.44	19.7	19.82	16.62	21.43	15.88	26.62	20.07
													24.64	11.04	21.46	24	20.94	22.43	23.5	20.26
													19.97	19.44	29.14	17.34	34.3	22.67	20.67	18.95
													28.88	19.07	25.6	17.86	27.1	27.29	34.95	16.62
													22.55	21.32	19.64	20.65	30.47	19.4	18.26	26.8
													21.66	17.36	21.66	18.09	20.26	18.74	20.95	28.37
													21.66	26.24	18.28	27.44	26.44	18.95	25.27	26.28
													23.02	18.74	18.06	30.7	31.38	16.29	27.47	21.67
													23.1	25.6	18.74	20.11	27.86	17.16	20.38	18.74
													21.38	22.38	17.83	21.23	27.17	27.17	15.98	18.11
													21.72	23.11	17.39	15.31	20.55	26.08	26.72	22.67
													25.54	15.55	20.42	19.5	21.02	28.31	16.14	20.98
													25.99	19.91	32.32	16.03	27.63	23.15	20.33	15.95
													20.44	17.56	27.58	20.44	25.06	21.23	15.3	18.49
													19.37	20.95	27.49	24.35	22.48	19.61	20.65	16.22
													26.15	19.82	17.56	24.92	19.64	23.11	15.58	22.04
													19.97	23.43	24.43	19.64	18.11	21.24	21.99	24.59
													22.67	17.86	20.53	29.82	17.56	20.68	19.44	23.03
													25.58	16.14	26.95	30.64	20.65	25.54	21.08	19.37
													20.43	20.52	30.67	19.82	23.75	19.5	24.89	20.82
													18.06	20.33	19.64	14.33	21.43	21.66	19.91	18.49
													17.58	14.62	14.51	19.22	21.67	28.03	17.16	28.99
													20.98	29.62	25.43		26.03	25.27	24.27	15.18
													19.82	26.71	16.46		31.91	22.67	17.39	15.35
													17.87	26.72	21.33		23.51	17.16	21.96	21.67
													13.56	28.66	22.67		24.69	17.86	22.3	20.12
													15.9	22.56	22.83		20.65	19.7	23.91	18.56
													19.42	24.92	20.38		19.7	16.14	20.23	24.68
													25.02	27.21	16.91		18.41	26.28	24.43	16.32
													27.44	27.87	18.22		13.31	24.81	19.72	17.57
													32.69	28.19	21.25		14.02	30.71	22.93	19.47
													26.28	15.5	16.14		22.94	25.64	23.28	20.84
													20.98	32.04	24.69		27.29	28.6	22.98	24.12
													20.53	21.32	22.48		17.39	18.73	20.33	17.91
													21.38	25.06			12.29	23.87	14.33	29.1
													24.35	23.65			24.43	28.3	14.51	25.22
													26.28	16.6			23.82	23.83	30.23	23.43
													20.33	27.67			21.13	20.98	19.42	17.16
													25.52	33.56			18.73	15.62	23.92	18.56
													24.2	21.54			26.08	19.72	24.69	20.14
													24.35	27.67			21.72	24.54	24	21.54
													24	20.98			14.62	24.69	18.63	19.54
													27.87	26.54			21.32	16.99	19.7	19.06
													28.08	24.67			20.07	23.92	24	21.54
													20.67	22.98			20.11	32.43	19.86	18.56
													22.83				23.2	20.42	24.59	22.66
													25.51				21.71	29.68	23.51	16.85
													24.54				19.54	26.35	16.48	18.83
													19.72				17.7	17.34	34.24	20.11
													25.88				20.94	21.96	22.3	25.64
													18.05				15.3	27.49	15.83	19.97
													28.03				19.64	27.39	20.94	18.06
													19.64				21.43	17.04	18.83	19.7
													17.56				27.58	17.39	17.93	15.43
													27.77				20.94	22.67	28.85	33.44
													20.65				26.48	23.38	15.95	19.18
													29.39				28.08	38.43	19.82	25.43
													21.96				19.49	21.72	21.99	18.11
													24.04				21.23	31.7	21.05	30.64
													21.08				19.82	24	16.03	22.83
													24				19.54	20.95	20.23	15.43
													20.67				23.25	18.99	18.99	16.03
													24.13				19.54	20.53		19.07
													19.61				19.5	45.48		26.87
													18.05				19.97	21.08		25.06
													19.64				23.3	26.54		37.27
													16.29				19.22	20.52		19.91
													24.69				20.52	21.92		19.97
													19.54				20.55	16.74		22.61
													24				34.39	15.62		18.77
													29.32				23.1	21.67		22.61
													21.13				19.06	15.18
													22.43				32.71	22.48
													20.94				30.15	22.67
													23.11				27.44
													17.16				25.71
													27.18				23.57
													19.7				26.03
													27.87				17.83
													22.98				20.23
													21.67				17.83
													24.13				21.96
													20.23				21.96
													19.86				16.22
													17.46				24.5
													19.18				24.43
													24.21				25.27
													16.03				23.68
													20.84				15.88
													18.83				21.24
													23.02				15.18
													19.44				19.44
													21.71				18.78
													19.44				15.5
													13.79				27.29
													14.51				31.84
													13.31				31.45
													15.73				21.67
													18.74				22.46
																	24.69
																	22.48
																	20.21
																	19.37
																	16.6
																	14.24
																	22.29
																	26.56
																	21.54
																	20.33
																	30.03
																	19.61
																	19.61
																	18.83
																	20.52
																	27.44
																	27.77
																	24
																	28.89
																	29.62
																	30.36
																	24.71
																	18.56
																	17.39
																	37.3
																	24.67
																	24.64
																	15.95
																	18.83
																	21.66
																	28.31
																	23.43
																	21.99
																	17.04
																	28.15
																	21.33
																	22.41
																	17.62
																	22.66
																	25.39
																	16.48
																	32.36
																	29.1
																	25.27
																	21.67
																	21.96
																	22.39
																	25.52
																	26.09
																	25.28
																	22.3
																	18.73
																	28.89
																	21.32
																	23.03
																	19.18
																	23.57
																	21.63
																	22.67
																	21.08
																	16.48
																	19.18
																	19.54
																	31.91
																	22.55
																	30.43
																	27.63
																	17.36
																	18.41
																	23.75
																	19.44
