# Supplementary material for: Megakaryocytes assemble a three-dimensional cage of extracellular matrix that controls their maturation and anchoring to the vascular niche
Source: eLife. 2025 Oct 8;14:RP104963. doi: 10.7554/eLife.104963 (PMC12507435; doi:10.7554/eLife.104963)
Supplement: Figure 6—source data 1. [file elife-104963-fig6-data1.xlsx]

## Sheet: Figure 6
DATA FIGURE 6																																							STATISTICS
Figure 6B left - Length of the Collagen IV fibers											Figure 6B right - Mesh size (µm)							Figure 6D - Number MK/area					Figure 6F left -MK density					Figure 6F right- MK maturation stages (%)											Mann-Whitney (figure 6B left - fibre length)
DMSO					B + I						DMSO			B + I				Mice ≠	DMSO	Mice ≠	B + I		Mice ≠	DMSO	Mice ≠	B + I		DMSO					B + I						DMSO vs B+I
Assay	Number MK	Length		Mean	Assay	Number MK	Length		Mean		Assay	MK	Openings	Assay	MK	Openings		1	8	1	18		1	4	1	2		Assay ≠	% Stage I	% Stage II	% Stage III	% pyrenocytes	Assay ≠	% Stage 1	% Stage 2	% Stage 3	% pyrenocytes		<0,0001		****
1	MK 1	9.1		9.939	1	MK 1	9.39		8.32		1	1	12.28	1	1	1.8			5		16			2		2		1	20	20	60	0	1	12.9	35.5	45.16	6.45
		8.44					8.08						6.42			3.31			6		16			2		2			22	7.4	70.3	0		15.15	27.8	51.5	6		t-test (figure 6B right - mesh size)
		8.6					6.97					2	6.38			5.86			7		15			1		3		2	9.5	4.7	80.9	4.7		4.35	30.4	60.8	4.34		DMSO vs B+I
		9.46					9.51						5.75			2.55			6		18			5		3			11.8	5.9	76.5	5.9	2	18.75	50	31.2	0		<0,0001		***
		11.49					7.68						5.75			4.43			7		18			4		4		3	20.3	22	55.9	1.7		11.1	62.9	22.2	3.7
		6.99					9.04						8.49			3.63			6		15			2		3		mean	16.72	12	68.72	2.46	3	8	44	44	1		Mann-Whitney (figure 6D - number MK/area)
		7.74					6.64					3	11.56			1.99			7		14			1		4		sem	2.24	3.32	4.23	1	mean	11.7083	41.7667	42.4767	3.58167		DMSO vs B+I		**** <0,0001
		14.83					9.89					4	15.51		2	3.31			7		18			1		0							sem	1.9	4.9	5.17	0.97
		12.33					7.7						7.46			3.59			5		18			2		5
		10.41					8.26					5	12.12			5.82			1		14			0		2		Figure 6H - Number of released MK (BM Explants)											Mann-Whitney (figure 6F left - MK density)
	MK 2	13.43		11.33		MK 2	5.08		7.06				4.79			8.37		2	9	2	16			1		2		3h				6H							DMSO vs B+I
		14.7					9.54						3.59		3	4.43			9		14			0		1		DMSO		B + I		DMSO		B + I					0.0012		**
		8.8					5.46					6	6.06			3.79			8		9			4		1		Assay ≠	Number MK	Assay ≠	Number MK	Assay	Number MK	Assay	Number
		9.17					6.71						8.17			3.03			9		20			3		5		1	57	1	63	1	106	1	77				one-way ANOVA with Tukey correction (figure 6F right - maturation stages)
		9.02					3.96						6.86			4.27			6		10			4		1		2	37	2	36	2	65	2	53				DMSO vs B+I	stage I	stage II	Stage III	pyrenocytes
		13.28					7.22				2	7	13.48			8.25			5		20			4		4		3	84	3	47	3	98	3	41					ns 0,9636	*** 0,0007	** 0,003	ns
		8.96					6.66					8	10.81		4	7.74			7		10			2		4		4	83	4	74	4	84	4	48
		11.68					5.38						8.49			1.99			7		11			2		4		5	63	5	89	5	98	5	89				unpaired t test (figure 6H - Number of released MK (BM Explants))
		11.57					9.84					9	21.29			6.58			5		17			2		2		6	109	6	61	6	84	6	61				DMSO vs B+I	3h		6h
		12.71					10.79						2.99			6.02			9		9			1		8		mean	72.1667		61.6667	mean	89.1667		61.5					ns		*0,0161
	MK 3	12.92		15.47		MK 3	5.9		6.77			10	9.61		5	2.91			6		14			1		2		sem	9.34		7.02	sem	5.46		6.8
		13					5.97						5.62			5.9		3	3		11			1		1		Total MK	433		370	Total MK	535		369
		15.53					5.92						3.27			6.86			8	3	10		2	4		3
		15.21					6.07					11	3.12			5.42			9		11			1		2
		15.39					7.44						2.56			1.67			10		9			2		2
		12.86					8.41						6.46	2	6	3.79			5		16			0		2
		16.94					7.92						12.66			4.35			7		10			3		2
		17.5					6.15					12	13.44			7.02			9		11			3		5
		16.37					8.37						4.63			5.66			7		13			3		4
		19					5.47				Stats	mean	8.26276		7	7.57			12		19			4	2	2
	MK 4	6.41		7.56		MK 4	8.28		7.28			sem	0.802754			6.38			8		16			0		3
		12.17					5.44					Number MKs	12			1.19			6		9			3		4
		6.39					4.64									4.59		Mean	6.93939		7			2		1
		11.21					8.24							Stats	mean	4.66879		SEM	0.363952		11			1		3
		1.28					8.4								sem	0.346466		total	229	Mean	13.8			3		3
		9.66					8.59								Number MK	7				SEM	0.625508			1		1
		7.69					7.99													total	483			1		4
		7.85					6.73																	0		6
		6.9					7.04																	1		1
		6.06					7.45																	3		2
	MK 5	10.74		8.67		MK 5	6.99		6.44															1		2
		8.52					7.65																	1		4
		10.52					4.56																3	0		3
		8.91					8.48																	0		3
		8.34					5.63																	2		0
		7.66					4.72																	3		5
		8.81					8.17																	4		1
		8.39					6.87																	3		1
		8.13					5.27																	3		3
		6.67					6.05																	3		4
	MK 6	9.1		8.87		Mk 6	5.64		5.82															3		2
		7.9					8.97																	0		1
		10.45					4.53																	3	3	3
		14.14					6.52																	1		1
		8.95					5.13																	3		5
		10.26					4.81																	3		1
		7.66					4.83																	3		3
		6.39					5.73																	3		2
		5.94					7.1																	1		2
		7.88					4.99																	0		0
2	MK 7	8.81		9.76		MK 7	6.22		5.91															1		4
		11.16					5.41																	0		4
		11.51					4.39																	2	Mean	2.68254
		11.23					5.25																	2	sem	0.196
		9.53					7.15																	2	total	169
		11.12					5.19																	3
		8.46					5.82																	1
		8.56					7.91																	1
		9.3					5.69																	0
		7.93					6.12																	1
	MK 8	10.46		8.73		Mk 8	6.47		7.74															2
		8.11					7.3																	0
		7.24					9.4																	1
		8					9.07																	0
		9.52					8.21																	1
		10.59					5.37																	0
		8.27					6.12																	2
		8.63					7.4																	0
		8.69					9.26																	2
		7.72					8.78																mean	1.8125
	MK 9	7.79		8.62	2	MK 9	7.73		6.1														sem	0.14
		7.65					4.8																total	145
		10.95					6.29
		7.42					2.82
		8.35					7.06
		8.31					9.38
		8.57					5.39
		9.43					6.86
		7.33					4.55
		10.37					6.05
	MK 10	9.2		8.91		MK 10	4.39		6.19
		8.92					6.09
		8.6					9.37
		10.4					5
		10.96					6.4
		11.4					6.57
		8.04					6.37
		7.1					5.8
		6.95					6.46
		7.53					5.44
	MK 11	11.5		9.98		Mk 11	6.28		6.94
		9.13					6.21
		7.46					5.78
		8.22					8.41
		12.41					6.35
		8.42					6.05
		9.81					7.95
		8.18					7.84
		10.67					7.58
		14.01					6.98
	MK 12	13.45		10.87		MK 12	7.99		6.99
		8.49					8.53
		11.49					5.93
		8.41					5.25
		11.22					6.69
		11.25					6.58
		11.32					6.63
		12.71					8.12
		11.27					7.28
		9.14					6.87
	MK 13	9.85		11.51		MK 13	6.94		6.12
		8.35					5.87
		9.08					4.88
		13.18					7.54
		11.05					6.07
		14.35					5.66
		13.66					6.81
		9.19					7.74
		9.98					4.13
		16.34					5.48
	MK 14	13.5		11.37		Mk 14	5.81		5.78
		12.94					5.53
		10.63					5.32
		10.85					6.05
		12.37					5.85
		10.33					6.79
		9.6					5.86
		9.29					5.46
		8.94					5.41
		15.28					5.72
3	MK 15	9.46		9.56	3	MK 15	8.46		8.12
		8.9					6
		10.34					7.45
		9.77					7.75
		7.8					7.68
		8.47					8.24
		10.94					8.97
		12.92					8.67
		9.66					9.04
		7.37					8.87
	MK 16	11.44		9.86		MK 16	9.51		8.1
		8.15					6.34
		11.24					11.31
		9.75					8.13
		9.78					5.71
		10.02					8.94
		8.5					7.25
		7.59					8.66
		12.12					7.51
		9.95					7.57
	MK 17	10.84		10.55		MK 17	8.35		6.1
		8.75					5.17
		15.12					5.31
		9.23					5.57
		10.5					4.76
		10.63					5.73
		11.32					5.57
		11.77					8.41
		9.21					5.46
		8.17					6.59
	Mk 18	9.6		10.34		MK 18	5.34		7.29
		8.99					7.38
		8.59					6.97
		9.3					6.62
		12.23					7.15
		11.18					8.26
		10.94					7.06
		11.2					6.98
		9.51					6.04
		11.83					11.11
	MK 19	11.47		11.14		MK 19	5.37		6.21
		10.33					6.35
		11.45					5.01
		10.66					6.33
		12.97					7.64
		12.05					5.65
		8.35					7.02
		9.65					6.39
		14.28					7.28
		10.16					5.12
	MK 20	8.27		9.96		MK 20	4.37		5.3
		8.67					4.67
		9.31					4.76
		9.52					5.28
		9.09					5.34
		12.17					4.68
		11.98					5.64
		10.08					5.45
		9.23					6.65
		11.25					6.14
		Stats	Mean	10.15		MK 21	6.67		6.87
			sem	0.1716			5.94
							9.27
							7.5
							6.62
							6.3
							5.52
							7.01
							7.07
							6.72
						Mk 22	7.08		6.91
							6.02
							6.98
							6.78
							7.5
							6.98
							6.73
							7.42
							7.52
							6.14
							Stats	Mean	6.742
								sem	0.097
